# Supplementary material for: OsMADS58 Stabilizes Gene Regulatory Circuits during Rice Stamen Development
Source: Plants (Basel). 2022 Oct 28;11(21):2899. doi: 10.3390/plants11212899 (PMC9658454; doi:10.3390/plants11212899)
Supplement: Supplementary file 1 [file plants-11-02899-s001.zip]

Archive with 16 entries (16 files):
- Figure 10A WT dSpm network.pdf
- Figure 10B WT CRIS network.pdf
- Figure 8A WT dSpm network_sub.pdf
- Figure 8B WT CRIS network_sub.pdf
- Figure 8C WT dSpm network_sub_chloroplast.pdf
- Figure 8D WT CRIS network_sub_chloroplast.pdf
- Figure 8E WT dSpm network_sub_oxidation-reduction.pdf
- Figure 8F WT CRIS network_sub_oxidation-reduction.pdf
- Figure 8G WT dSpm network_sub_cell-cycle.pdf
- Figure 8H WT CRIS network_sub_cell-cycle.pdf
- Figure 8I WT dSpm network_sub_meiosis.pdf
- Figure 8J WT CRIS network_sub_meiosis.pdf
- Figure 8K WT dSpm network_sub_tapetum.pdf
- Figure 8L WT CRIS network_sub_tapetum.pdf
- Supplementary Figures.pdf
- Supplementary Tables.xlsx
